# Supplementary material
Source: MDPI journal article supplement (https://www.mdpi.com/2075-5309/13/1/57)
Supplement: s1 [file s1 › buildings-2043354-supplementary.pdf]

## Supplementary Materials

**Table S1.** English translation of Hospice PHEQIs.

| <i>Scale</i>    | <i>Item</i>                                                                                                                                                                                                                                                                                                                                                                                                                                                                                                                                                                                                                                                                                                                                                                                                                                                                                                                                                                                                                                                                              | <i>Response Scale</i>                                                                                                                               |
|-----------------|------------------------------------------------------------------------------------------------------------------------------------------------------------------------------------------------------------------------------------------------------------------------------------------------------------------------------------------------------------------------------------------------------------------------------------------------------------------------------------------------------------------------------------------------------------------------------------------------------------------------------------------------------------------------------------------------------------------------------------------------------------------------------------------------------------------------------------------------------------------------------------------------------------------------------------------------------------------------------------------------------------------------------------------------------------------------------------------|-----------------------------------------------------------------------------------------------------------------------------------------------------|
| External spaces | <p>Hospice entrance is welcoming</p> <p>From the outside, hospice buildings are nice</p> <p>In the external hospice area signposting is unclear</p> <p>In the external hospice area paths and sidewalks are in good condition</p> <p>External hospice area is not very clean</p> <p>In the external hospice area it is difficult to find your way around</p> <p>In the external hospice area there are nice trees</p> <p>From the outside, the colours of the hospice buildings are unpleasant</p> <p>In this hospice it is easy to find care units and services you are looking for</p> <p>In the external hospice area there are green spaces where you can relax or meet people</p> <p>External hospice area is well-kept</p> <p>From the outside, the shapes of the hospice buildings are unpleasant</p> <p>In the external hospice area there is a lack of well-kept green spaces</p> <p>In the external hospice area there are plenty of signposts to find your way</p> <p>Hospice building is in poor condition</p> <p>There is a lack of green spaces with benches to sit on</p> | <p>0 = Totally Disagree</p> <p>1 = Partially Disagree</p> <p>2 = Neither Disagree nor Agree</p> <p>3 = Partially Agree</p> <p>4 = Totally Agree</p> |

| <i>Scale</i>           | <i>Item</i>                                                                                                                                                                                                                                                                                                                                                                                                                                                                                                                                                                                                                                                                                                                                                                                                                                                                                                                                                                                                                                                                                                                                                                                                                                                                                         | <i>Response Scale</i>                                                                                                                               |
|------------------------|-----------------------------------------------------------------------------------------------------------------------------------------------------------------------------------------------------------------------------------------------------------------------------------------------------------------------------------------------------------------------------------------------------------------------------------------------------------------------------------------------------------------------------------------------------------------------------------------------------------------------------------------------------------------------------------------------------------------------------------------------------------------------------------------------------------------------------------------------------------------------------------------------------------------------------------------------------------------------------------------------------------------------------------------------------------------------------------------------------------------------------------------------------------------------------------------------------------------------------------------------------------------------------------------------------|-----------------------------------------------------------------------------------------------------------------------------------------------------|
| Internal Common spaces | <p>It is easy to recognize the entrance of this care unit</p> <p>(In this care unit) there is enough quietness</p> <p>(In this care unit) it is difficult to find your way around</p> <p>(In this care unit) it is too chaotic from the outside</p> <p>This care unit's entrance is welcoming</p> <p>(In this care unit) information points are badly located</p> <p>(In this care unit) you can hear dins and screams</p> <p>(In this care unit) signposting allows you to find what you are looking for</p> <p>This care unit is clean</p> <p>(In this care unit) you can easily find information points</p> <p>(In this care unit) there is not much noise from the outside</p> <p>In this care unit there are few signposts for orientation</p> <p>In this care unit natural lighting is inadequate</p> <p>In this care unit furnishings are in poor condition</p> <p>This care unit has large windows</p> <p>In this care unit walls, floors and ceilings are unpleasant</p> <p>In this care unit the intensity of the artificial light is satisfactory</p> <p>In this care unit you can see green spaces from the windows</p> <p>In this care unit the living room spaces are large</p> <p>From the windows there is an uninteresting view</p> <p>The number of beds per room is adequate</p> | <p>0 = Totally Disagree</p> <p>1 = Partially Disagree</p> <p>2 = Neither Disagree nor Agree</p> <p>3 = Partially Agree</p> <p>4 = Totally Agree</p> |

|  |                                                                                                                                                                                                                                                                                                                                                                                                                                                                                                                                                                                                                                                                                                                                                                                                                                                                                                                       |  |
|--|-----------------------------------------------------------------------------------------------------------------------------------------------------------------------------------------------------------------------------------------------------------------------------------------------------------------------------------------------------------------------------------------------------------------------------------------------------------------------------------------------------------------------------------------------------------------------------------------------------------------------------------------------------------------------------------------------------------------------------------------------------------------------------------------------------------------------------------------------------------------------------------------------------------------------|--|
|  | <p>In this care unit windows are dirty</p> <p>In this care unit the quality of furnishings is good</p> <p>This care unit needs more windows</p> <p>(In this care unit) corridors' walls and floors have nice colours</p> <p>In this care unit temperature is inadequate (too hot or too cold)</p> <p>In this care unit walls, floors and ceilings are well kept</p> <p>(In this care unit) furnishings are unpleasant</p> <p>In this care unit the air exchange from outside is adequate</p> <p>In this care unit seats are uncomfortable</p> <p>In this care unit the living rooms are well equipped</p> <p>In this care unit air humidity is adequate (neither too wet nor too dry)</p> <p>In this care unit walls, floors and ceilings are in poor condition</p> <p>In this care unit the air is unbreathable</p> <p>In this care unit furnishings are in good condition</p> <p>This area is clearly delimited</p> |  |
|--|-----------------------------------------------------------------------------------------------------------------------------------------------------------------------------------------------------------------------------------------------------------------------------------------------------------------------------------------------------------------------------------------------------------------------------------------------------------------------------------------------------------------------------------------------------------------------------------------------------------------------------------------------------------------------------------------------------------------------------------------------------------------------------------------------------------------------------------------------------------------------------------------------------------------------|--|

| <i>Scale</i>            | <i>Item</i>                                                                                                                                                                                                                                                                                                                                                                                                                                                                                                                                                                                                                                                                                                                                                                                                                                                                                                                                                                                                                                                                                                                                                                                                                                                             | <i>Response Scale</i>                                                                                                                               |
|-------------------------|-------------------------------------------------------------------------------------------------------------------------------------------------------------------------------------------------------------------------------------------------------------------------------------------------------------------------------------------------------------------------------------------------------------------------------------------------------------------------------------------------------------------------------------------------------------------------------------------------------------------------------------------------------------------------------------------------------------------------------------------------------------------------------------------------------------------------------------------------------------------------------------------------------------------------------------------------------------------------------------------------------------------------------------------------------------------------------------------------------------------------------------------------------------------------------------------------------------------------------------------------------------------------|-----------------------------------------------------------------------------------------------------------------------------------------------------|
| Internal Private spaces | <p>In this in-patient area furnishings are in good condition</p> <p>In this in-patient area walls, floors and ceilings are in poor condition</p> <p>In this in-patient area furnishings are unpleasant</p> <p>In this in-patient area walls, floors and ceilings are well kept</p> <p>In this in-patient area furnishings are in poor condition</p> <p>In this in-patient area walls, floors and ceilings have nice colours</p> <p>In this in-patient area walls, floors and ceilings are unpleasant</p> <p>It (the in-patient/waiting area) is clean</p> <p>In this in-patient area the quality of furnishings is good</p> <p>In this in-patient area the air is unbreathable</p> <p>In this in-patient area seats are uncomfortable</p> <p>In this in-patient area air humidity is adequate (neither too wet nor too dry)</p> <p>In this in-patient area temperature is inadequate (too hot or too cold)</p> <p>In this in-patient area windows are dirty</p> <p>This in-patient area needs more windows</p> <p>This in-patient area does not get enough sunlight</p> <p>This in-patient area has large windows</p> <p>In this in-patient area the air exchange from outside is adequate</p> <p>In this in-patient area you can see green spaces from the windows</p> | <p>0 = Totally Disagree</p> <p>1 = Partially Disagree</p> <p>2 = Neither Disagree nor Agree</p> <p>3 = Partially Agree</p> <p>4 = Totally Agree</p> |

|  |                                                                                                                                 |  |
|--|---------------------------------------------------------------------------------------------------------------------------------|--|
|  | <p>In this in-patient area the intensity of artificial lighting is satisfactory</p> <p>This in-patient area is large enough</p> |  |
|--|---------------------------------------------------------------------------------------------------------------------------------|--|
